# Supplementary material for: Two-pore channels function in calcium regulation in sea star oocytes and embryos
Source: Oxford University Press journal article supplement (doi:10.1242/dev.113563), 2014-11-07
Supplement: dev113563supp.pdf [file dev113563supp.pdf]

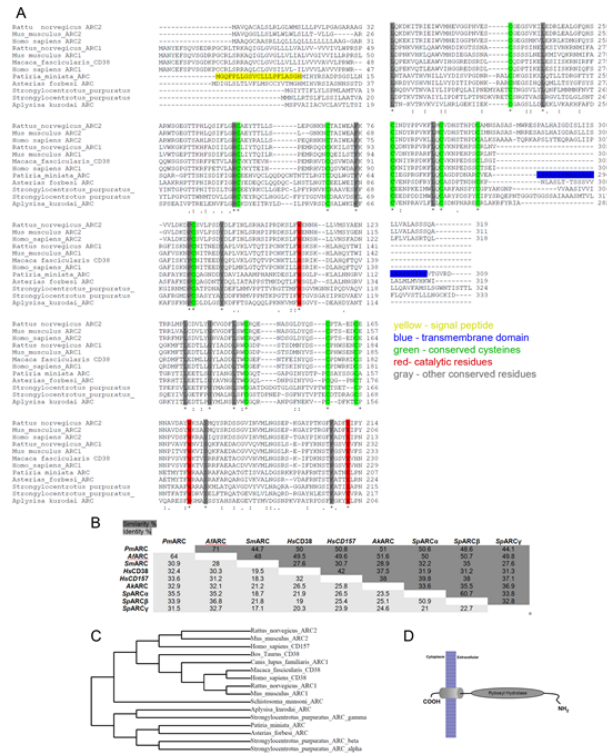

**Figure S1: *P. miniata* ADP ribosyl cyclase (PmARC).** One isoform of ARC was found in ovarian transcriptomes of *P. miniata*. **A**, Sequence alignment of ARC family proteins by ClustalW. Catalytic residues (red), conserved cysteines (green), identical residues (dark grey). The signal peptide (yellow) was predicted by SignalP 4.0 and the C-terminal transmembrane domain (blue) was predicted by TMHMM2. Putative sites for N-glycosylation (squares) were predicted by NetNGlyc 1.0. **B**, Percentage of identical (light grey) and similar (dark grey) residues amongst ARC proteins across species. Values relate to the alignment in (A). **C**, Phylogenetic relationship of cloned ARC proteins across different species using the Neighbor-Joining method by Phylotree. **D**, Predicted topology of mature *P. miniata* ARC protein. The ribosyl-hydrolase domain (Ribhydrolase) was predicted by Pfam (accession number PF02267) and transmembrane segment (cylinder) predicted by TMHMM2. *Hs*: *Homo sapiens*, *Sp*: *S. purpuratus*, *At*: *A. thaliana*, *Pm*: *P. miniata*, *Af*: *A. forbesi*, *Ak*: *A. kurodai*, *Rn*: *R. norvegicus*, *Sm*: *S. mansoni*, *Mm*, *M. musculus*, *Mf*: *M. fascicularis*.

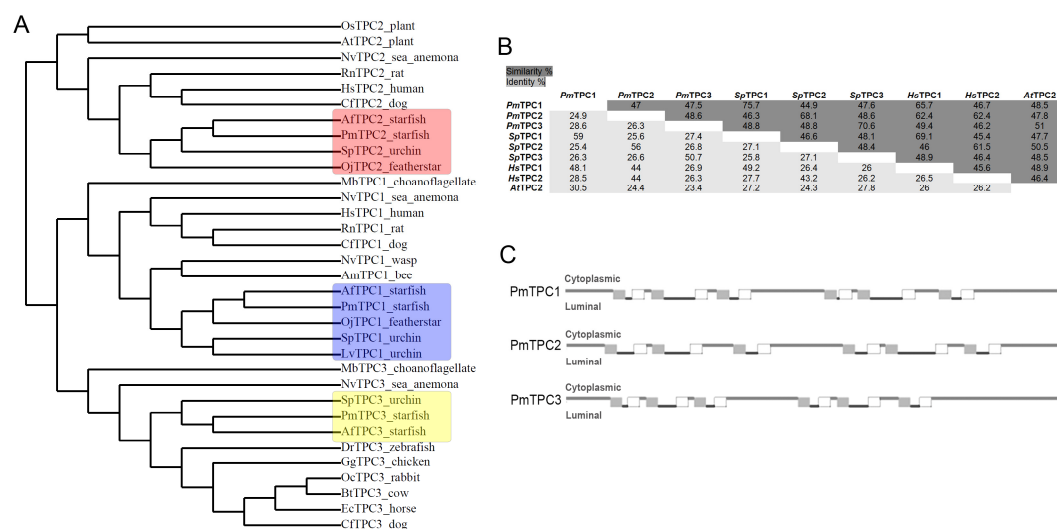

**Figure S2: *P. miniata* Two-Pore Channels (PmTPCs).** Three isoforms of TPCs were found in ovarian transcriptomes of *P. miniata* (PmTPC1, PmTPC2 and PmTPC3). **A**, Phylogenetic relationship of cloned PmTPCs across different species using the Neighbor-Joining method by Phylotree. **B**, Percentage of identical (light grey) and similar (dark grey) residues amongst TPC proteins across species. Values relate to the alignment in (A). **C**, Predicted topology of mature *P. miniata* TPCs. Transmembrane segments (cylinders) were predicted by TopCons server. *Hs*: *Homo sapiens*, *Sp*: *S. purpuratus*, *At*: *A. thaliana*, *Pm*: *P. miniata*, *Af*: *A. forbesi*, *Oj*: *O. japonicus*, *Lv*: *L. variegatus*, *Mb*: *M. brevicollis*, *Nv*: *N. vectensis*, *Rn*: *Rattus norvegicus*, *Cf*: *C. familiaris*, *Am*: *A. mellifera*, *Dr*: *D. rerio*, *Gg*: *G. gallus*, *Oc*: *O. cuniculus*, *Bt*: *B. Taurus*, *Ec*: *E. caballus*.

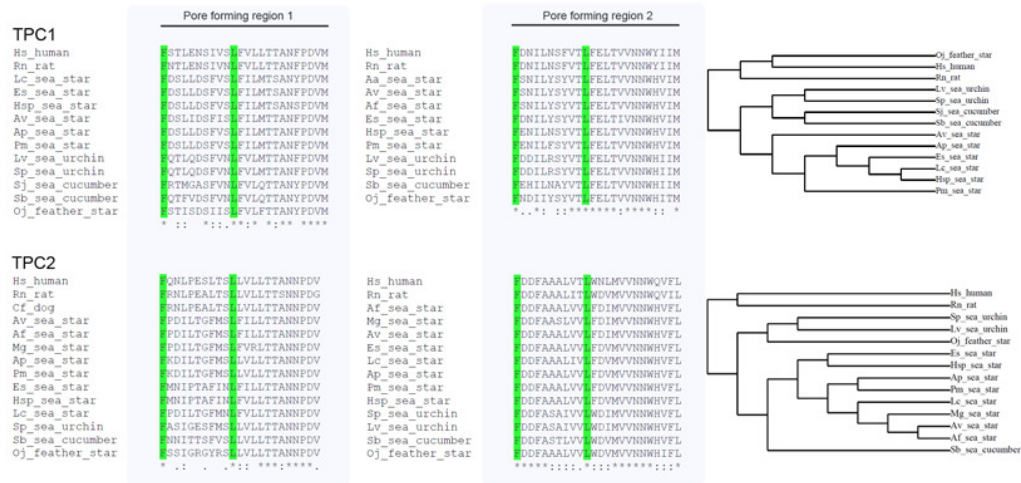

**Figure S3: Alignment of TPCs 1 and 2 putative pore forming regions from human, rat and different echinoderms. Residues in green are conserved between the pores and across the species. Lc, *L. clathrata*; Es, *E. spinulosus*; Av, *A. vulgaris* (*A. rubens*); Ap, *A. pectinifera* (*P. pectinifera*); Pm, *P. miniata*; Lv, *L. variegatus*; Sp, *S. purpuratus*; Sj, *S. japonicus* (*A. japonicus*); Sb, *S. briareus*; Oj, *O. japonicus*; Hsp, *Henricia* species; Af, *A. forbesi*; Rn, *R. norvegicus*; Cf, *C. familiaris*, Hs, *H. sapiens*.**

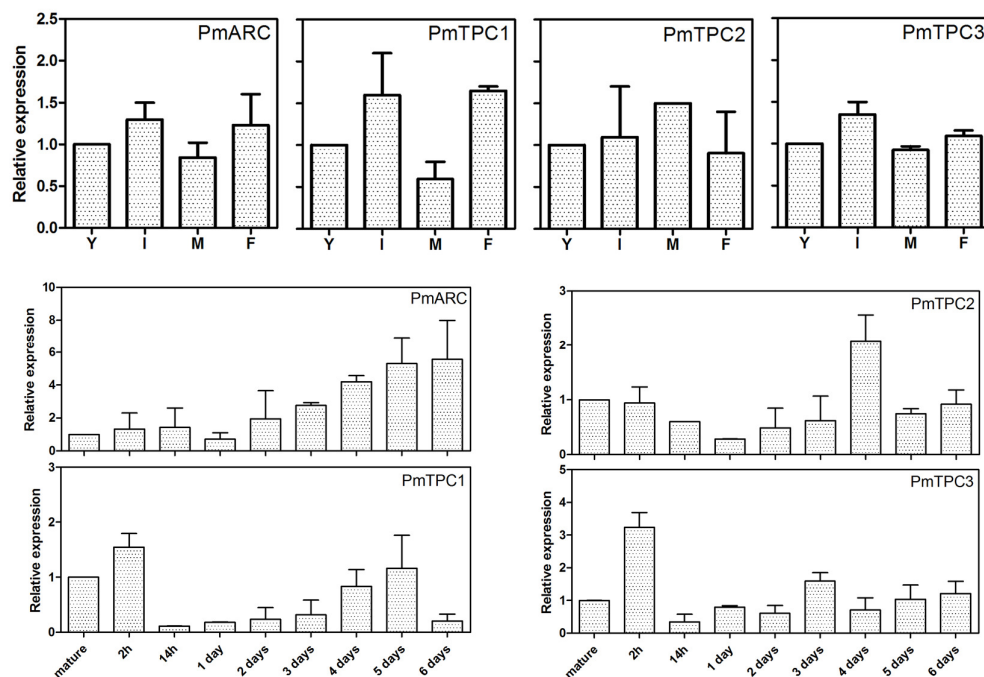

**Figure S4: qPCR for PmARC and PmTPCs isoforms throughout oogenesis and early embryogenesis of *P. miniata*.** RNA was extracted from different stages of oogenesis and embryogenesis and gene expression was accessed by Real-Time PCR. Values are normalized by the levels of *P. miniata* Ubiquitin cDNA. Oogenesis: (Y) young oocyte 50-100  $\mu$ m in diameter, (I) full grown immature oocyte, (M) mature egg, (F) egg 30 min after fertilization. Embryogenesis: mature egg, followed by embryos hours and days after fertilization as indicated in the image. Graphs show the mean ( $\pm$  1 S.D.) of at least three experiments.

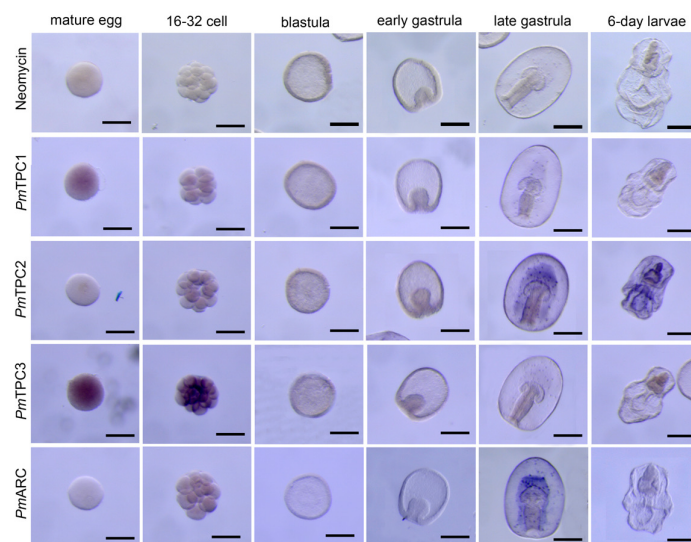

**Figure S5: Whole mount *In situ* hybridizations for PmARC and PmTPC isoforms in *P. miniata* eggs and embryos.** Neomycin was used as a negative control for staining. Embryonic stages are indicated in the image. Bars: 180  $\mu$ m.

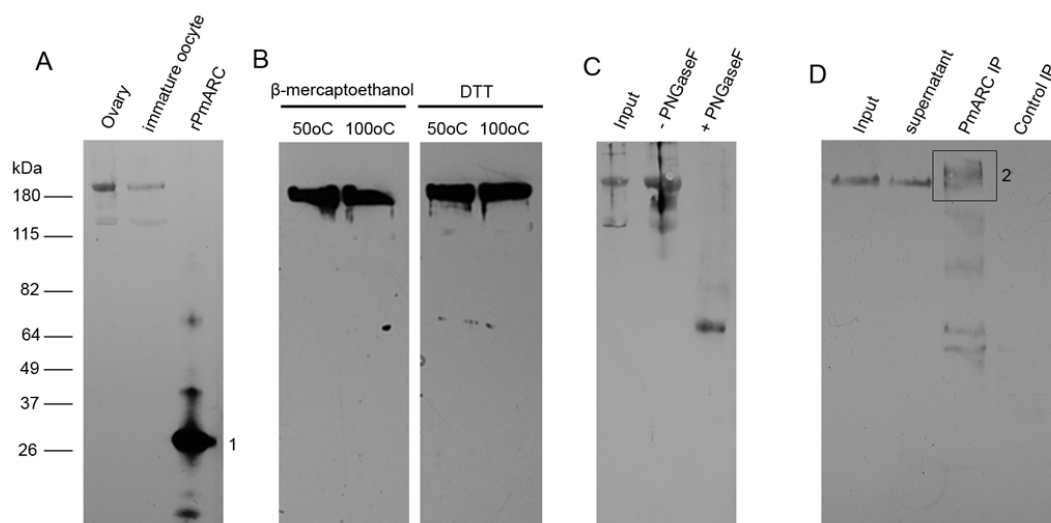

**Figure S6: PmARC immunoblots in different conditions.** **A**, endogenous PmARC from oocytes, ovaries and rPmARC. Note the difference in molecular weight. **B**, immature oocytes samples were prepared using lower heating and different reducing agents before loading in the gel. **C**, PNGase treatment of immature oocytes samples. **D**, immunoprecipitation of PmARC followed by immunoblotting. Samples marked 1 (in **A**) and 2 (in **D**) were excised from the gel and analyzed by mass spectrometry.

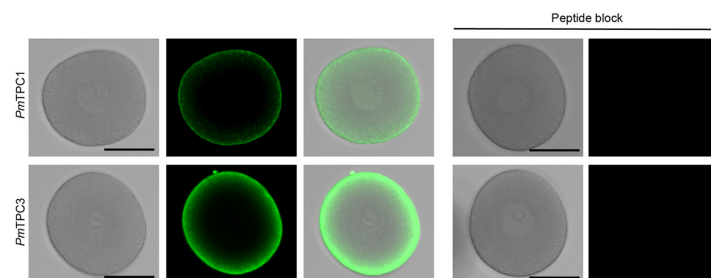

**Figure S7: Peptide-block immunolocalization of PmTPCs 1 and 2.** Oocytes were pre-incubated with 1 mg/ml of each of the peptides from the cocktail used to raise the antibodies in rabbits and processed for immunolocalization Bars: 150  $\mu$ m.

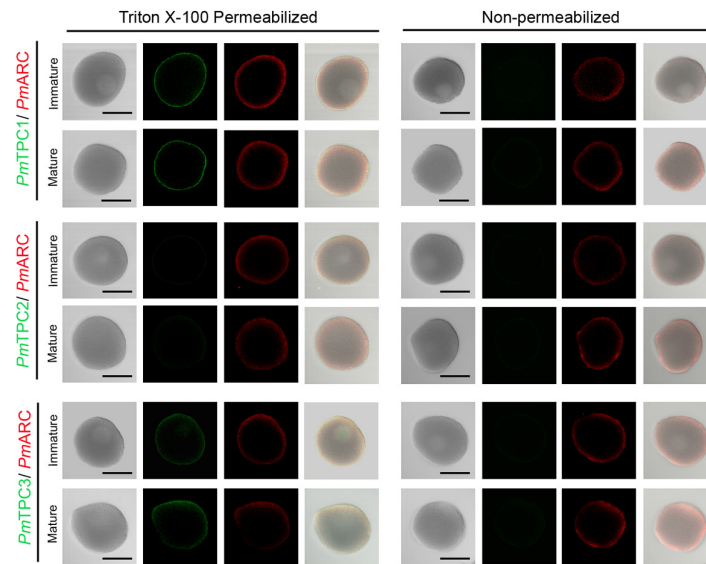

**Figure S8: Colocalization of PmTPCs and PmARC in immature oocytes and mature eggs with or without Triton X-100 permeabilization.** Note that PmTPCs signals decrease but are still detectable whereas PmARC signals are only slightly affected in non-permeabilized oocytes and eggs. Bars: 150  $\mu\text{m}$ .



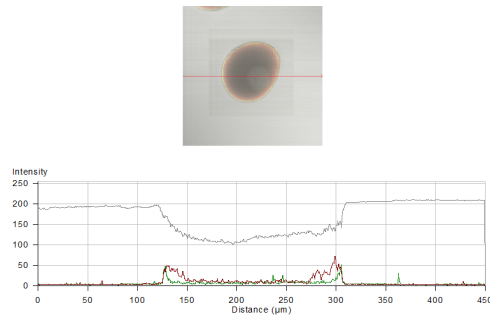

**Figure S9: Intensity line Plot for PmTPC3 and PmARC immunolocalization signals.** PmTPC3, green signal; PmARC, red signal, Bright field, gray signal.

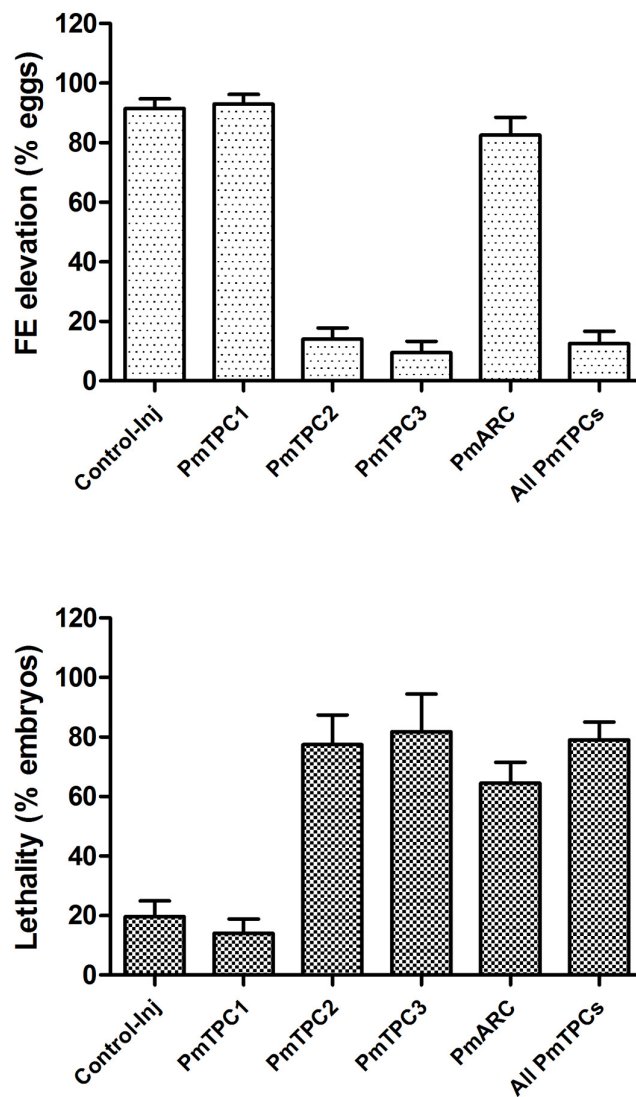

**Figure S10: Morpholino phenotypes quantifications.** Percentages of embryos presenting the fertilization envelope phenotype and lethality after gastrulation in the different morpholino knockdown experiments (n=6).

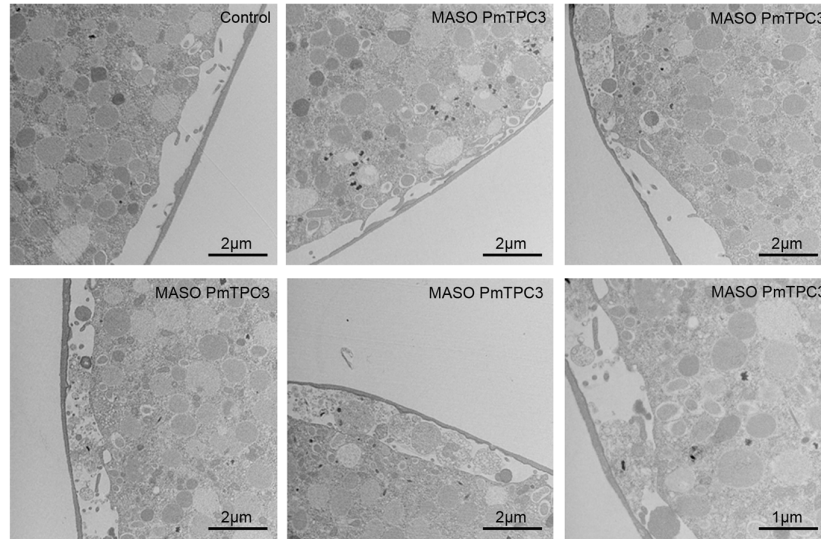

**Figure S11: PmTPC3-knockdown eggs 10 min after fertilization.** Collection of TEM images of the cortices and fertilization envelopes of PmTPC3 knockdown eggs.

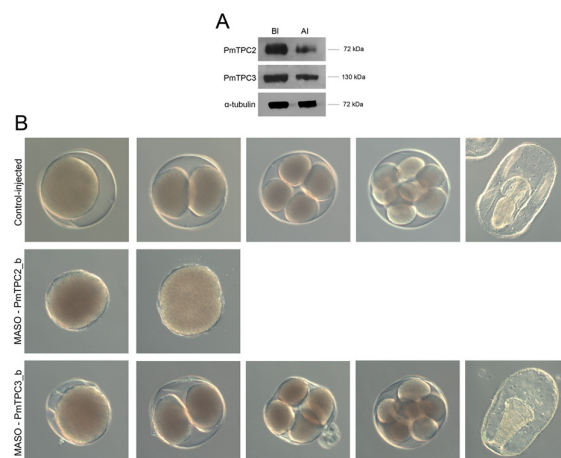

**Figure S12: Eggs and embryos after injections of morpholinos directed to different regions of the 5'UTR of PmTPCs 2 and 3. A, Immunoblotting before and after morpholino injections. B, Control and injected eggs and embryos at first cleavage, 8-16, 16-32 cell stage, and gastrulation.**

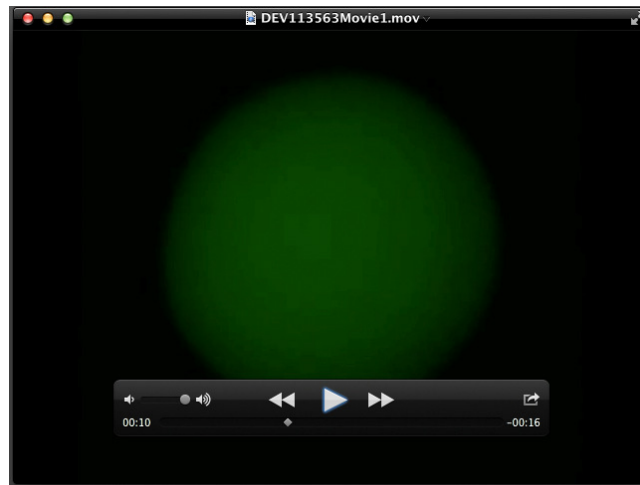

**Movie 1: Global calcium signals at fertilization in sea stars.** Control eggs and eggs co-injected with all three PmTPCs morpholinos. Control calcium signals and the two phenotypes described in Figure 5 are shown.

**Table S1:** Primers, peptides and morpholinos.

| <b>Primers and Peptides</b> | <b>Sequence</b>                                                                                   |
|-----------------------------|---------------------------------------------------------------------------------------------------|
| <b>5' and 3' RACEs</b>      |                                                                                                   |
| PmARC 5'RACE outer          | 5'- CGGAGCCAAGCAGGGGGAAGTGTGTC-3'                                                                 |
| PmARC 5'RACE inner          | 5'- GACTGGATGAAAGATGCCGGGGGTTG-3'                                                                 |
| PmTPC1 5'RACE outer         | 5'- CGTGATACGAAAATGGCTCCGTTGCCTG-3'                                                               |
| PmTPC1 5'RACE inner         | 5'- CAAGGACGACGATGGCTTCACAGAAC-3'                                                                 |
| PmTPC1 3'RACE outer         | 5'- GGAAACCGGCCACCACAATGACAGCG-3'                                                                 |
| PmTPC1 3'RACE inner         | 5'- GACAATGACAGCACGACCGCGTGCCAGC-3'                                                               |
| PmTPC2 5'RACE outer         | 5'- CGACTCCGAGGATCTACGACCAGGATGG-3'                                                               |
| PmTPC2 5'RACE inner         | 5'- GGGATTCATCGTAACTACTCGGTCTGCCT -3'                                                             |
| PmTPC2 3'RACE outer         | 5'- GACATCTACGCCTCTGATCTCAGGGG-3'                                                                 |
| PmTPC2 3'RACE inner         | 5'- CTCTACGCCGAGACCGAACAGCCAATGC-3'                                                               |
| PmTPC3 5'RACE outer         | 5'- GCGGAAGACTTTCTCATCACTCCCGTTTCC-3'                                                             |
| PmTPC3 5'RACE inner         | 5'- CAAGGATGGTGACAACAAGCATATCCAC-3'                                                               |
| PmTPC3 3'RACE outer         | 5'- GGAATCCGCTTCCGCATTGGAAAGAAATCC-3'                                                             |
| PmTPC3 3'RACE inner         | 5'- GAAATGTACAGGTGTCGTTGCAGGCCATG-3'                                                              |
| <b>qPCR</b>                 |                                                                                                   |
| ForPmARC                    | 5'-GCTGTGTGATAAAGGCAGCA-3'                                                                        |
| RevPmARC                    | 5'-GCCAGGACCAATGCAATACT-3'                                                                        |
| ForPmTPC1                   | 5'-ATCCTGGAGGCCTTTGTCTT-3'                                                                        |
| RevPmTPC1                   | 5'-TGCTTTGGTCCTTTTTCTGG-3'                                                                        |
| ForPmTPC2                   | 5'-TTGCTAGCGTGCTTTTGCTA-3'                                                                        |
| RevPmTPC2                   | 5'-GGCCATTGGCATATGTAACC-3'                                                                        |
| ForPmTPC3                   | 5'-CGACAGCAAGTTTGTCTGA-3'                                                                         |
| RevPmTPC3                   | 5'-CGGTGGACAGTCTGACATTG-3'                                                                        |
| ForPmUbiquitin              | 5'-TTCGGTGAAAGCCAAGATTC-3'                                                                        |
| RevPmUbiquitin              | 5'-CCCACCTCTCATGGCTAGAA-3'                                                                        |
| <b>In situ probes</b>       |                                                                                                   |
| ForIsPmARC                  | 5'-GAGGGCCGACCACGTCTAACATAAGC-3'                                                                  |
| RevIsPmARC                  | 5'-CTAGAAATGTAGTGAGTTCGGCGATTC-3'                                                                 |
| ForIsPmTPC1                 | 5'-TTAGCGGTAGTATACGACACTTTCAC-3'                                                                  |
| RevIsPmTPC1                 | 5'-AAAGAACGACTCGTAGGTTGTATTCT-3'                                                                  |
| ForIsPmTPC2                 | 5'-GCTGTCAAGTATCGAAGTATAAACCA-3'                                                                  |
| RevIsPmTPC2                 | 5'-TGAAGAAAAAGTACAGTCCAATGAC-3'                                                                   |
| ForIsPmTPC3                 | 5'-GTACGCCATTCTTTCAGAAGTACATA-3'                                                                  |
| RevIsPmTPC3                 | 5'-CCAATCATCAATCTTCTTTTCAATA-3'                                                                   |
| <b>Morpholinos</b>          |                                                                                                   |
| PmARC:                      | 5'-GGAAGTGTCCCATGACTGGATGAAA-3'                                                                   |
| PmTPC1                      | 5'-TGGACTTGTTAAATCGTTCATGGTT-3'                                                                   |
| PmTPC2                      | 5'-TGATGTTTTTTCATCAAAGCCAGCA-3'                                                                   |
| PmTPC3                      | 5'-GTTTTCTTACCATCAAGTCATCGC-3'                                                                    |
| PmTPC2b                     | 5'-AAAGCCAGCAAACGCAGTGTTCCGGA-3'                                                                  |
| PmTPC3b                     | 5'-ATTACGTCGTTTCACTTTCAGACTC-3'                                                                   |
| <b>Antibodies Peptides</b>  |                                                                                                   |
| PmTPC1                      | NH2-YLKEGENNHNFSHPKSQDC-CONH2<br>NH2-VQLKWKLKQDENRLWFEEC-CONH2<br>NH2-ADEIKEWVREQDQTRQDLQQC-CONH2 |
| PmTPC2:                     | NH2-ELRGRPSSYDESLDRIHPGRRSSESC-CONH2                                                              |

|        |                                    |
|--------|------------------------------------|
|        | NH2-DRDTSRRRKPPIVPKNNHILRKIC-CONH2 |
|        | NH2-WDREQQLEASDPNNQPSYC-CONH2      |
| PmTPC3 | NH2-ADLMRERKGSVVRPRSVSFKKC-CONH2   |
|        | NH2-NRSTPFFQKYIPSCYNSRVSEFIC-CONH2 |
|        | NH2-EENMGPEELDDIDEMNPYENEPIC-CONH2 |
| PmARC  | NH2-CEEHVQCLQQDQCNTNT-CONH2        |
|        | NH2-GINYDTPCPSAYSSGC-CONH2         |
|        | NH2-TMYTFWRAASRAFARQATGC-CONH2     |

---

**Table S2:** Protein Groups and Peptide-Spectrum Matches (PSMs) for the rPmARC and the immunoprecipitated endogenous PmARC after immunoblotting detection.

| <b>Protein Groups and Peptide-Spectrum Matches (PSMs)</b> |                         |                                                                                                                  |                      |                                                                                                     |
|-----------------------------------------------------------|-------------------------|------------------------------------------------------------------------------------------------------------------|----------------------|-----------------------------------------------------------------------------------------------------|
| <i>Sample ID</i>                                          | <i>Accession Number</i> | <i>Protein Name</i>                                                                                              | <i>Protein Score</i> | <i>Unique PSMs</i>                                                                                  |
| 1 - rPmARC                                                | Pm56316_0_T_1           | Locus_56316.0_Transcript_1/0_Con_3_Len_2051<br>~RPKM~2.96~NADA_APLCA~2e-43~ADP-<br>ribosyl_cyclase_maxframe_1080 | 293.44               | K.DESLFWSGLPK.L<br>K.LALNNGR.V<br>R.CEEHVQCLQQDQCNTNTTLR.G<br>K.DLQTLTDR.G<br>R.QATGTISVALDGSR.T    |
| 2 - PmARC IP<br>182kDa                                    | Pm56316_0_T_1           | Locus_56316.0_Transcript_1/0_Con_3_Len_2051<br>~RPKM~2.96~NADA_APLCA~2e-43~ADP-<br>ribosyl_cyclase_maxframe_1080 | 286.78               | K.DESLFWSGLPK.L<br>K.LALNNGR.V<br>K.LALNNGRVTGR.Y<br>R.CEEHVQCLQQDQCNTNTTLR.G<br>R.QATGTISVALDGSR.T |

**Sample ID**, numbers 1 and 2 refer to the bands from Figure S6. **Accession Nr.**, accession number from the searched database (DB). **Protein Name**, protein name in the DB. **Protein Score**, sum of the contributing peptide scores. **Unique PSMs**, unique peptide-spectrum matches that contribute to the protein assignment.
